# Supplementary material for: Survival Comparison of Different Operation Types for Middle Bile Duct Cancer: Bile Duct Resection versus Pancreaticoduodenectomy Considering Complications and Adjuvant Treatment Effects
Source: MDPI journal article supplement (doi:10.3390/cancers16020297), 2024-01-10
Supplement: s1 [file s1]

# Supplementary Materials: Survival Outcomes for Different Operation Types in the Era of Modern Chemotherapy for Middle Bile Duct Cancer: Bile Duct Resection versus Pancreaticoduodenectomy Considering Complications and Adjuvant Treatment Effects

Soo Yeun Lim, Hani Jassim Alramadhan, Hye Jeong Jeong, Hochang Chae, Hyeong Seok Kim, So Jeong Yoon, Sang Hyun Shin, In Woong Han, Jin Seok Heo and Hongbeom Kim

**Table S1.** Clinical Course of R1 Patients ( $n = 6$ ).

| No. | Frozen biopsy (intraoperative) | Frozen biopsy (permanent) | Reason for R1                | Final Stage | Adjuvant Treatment |
|-----|--------------------------------|---------------------------|------------------------------|-------------|--------------------|
| 1   | Carcinoma                      | Carcinoma                 | Patients condition, PHx      | IIB         | RTx                |
| 2   | Carcinoma                      | Carcinoma                 | Patients condition, PHx      | IIIB        | X                  |
| 3   | Atypical cell                  | Carcinoma                 | Changed Frozen biopsy result | IIA         | X                  |
| 4   | Highly Atypical cell           | Carcinoma                 | Changed Frozen biopsy result | IIB         | X                  |
| 5   | High grade dysplasia           | Carcinoma                 | Changed Frozen biopsy result | I           | X                  |
| 6   | High grade dysplasia           | Carcinoma                 | Changed Frozen biopsy result | IIB         | RTx                |

PHx, Past history; RTx, radiotherapy.

**Table S2.** Prognostic Factors for Disease-Free Survival in Patients with Middle Bile Duct Cancer ( $n = 520$ ).

| Variable           |               | Patients (n) | 5Y DFS (%) | Univariate analysis |             |         | Multivariate analysis |             |         |
|--------------------|---------------|--------------|------------|---------------------|-------------|---------|-----------------------|-------------|---------|
|                    |               |              |            | HR                  | 95% CI      | p-value | HR                    | 95% CI      | p-value |
| Sex                | male / female | 342/178      | 36.5/40.5  | 0.850               | 0.679-1.064 | 0.157   |                       |             |         |
| Age                | ≤ 65 / > 65   | 229/291      | 47.5/29.7  | 1.559               | 1.251-1.944 | <0.001  | 1.616                 | 1.293-2.020 | <0.001  |
| BMI                | ≤ 25 / > 25   | 378/142      | 36.2/41.9  | 0.841               | 0.657-1.076 | 0.167   |                       |             |         |
| ASA score          | I             | 82           | 35.8       |                     |             | 0.256   |                       |             |         |
|                    | II            | 395          | 40.3       | 0.944               | 0.709-1.257 | 0.694   |                       |             |         |
|                    | III/IV        | 43           | 19.0       | 1.276               | 0.834-1.951 | 0.262   |                       |             |         |
| Preop CA19-9       | ≤ 35 / > 35   | 265/255      | 44.5/31.1  | 1.538               | 1.243-1.902 | <0.001  | 1.335                 | 1.076-1.657 | 0.009   |
| T-stage            | T1&2/T3&4     | 448/72       | 41.1/17.2  | 2.001               | 1.517-2.637 | <0.001  | 1.499                 | 1.124-1.998 | 0.006   |
| N-stage            | N(-)/N(+)     | 359/161      | 45.8/20.2  | 2.120               | 1.702-2.640 | <0.001  | 1.965                 | 1.558-2.478 | <0.001  |
| Operation          | BDR / PD      | 131/389      | 34.4/39.0  | 0.970               | 0.762-1.235 | 0.803   |                       |             |         |
| Resection margin   | R0 / R1       | 514/6        | 38.4/0     | 1.858               | 0.827-4.172 | 0.127   |                       |             |         |
| Complications      | no / yes      | 389/131      | 39.6/32.3  | 1.111               | 0.871-1.418 | 0.395   |                       |             |         |
| Adjuvant treatment | no / yes      | 403/117      | 39.3/32.9  | 1.179               | 0.918-1.514 | 0.198   |                       |             |         |

Major complication indicated Clavien-Dindo grade ≥ 3. PD/PPPD, pancreaticoduodenectomy/pylorus-preserving pancreaticoduodenectomy; BDR, Bile duct resection.
